# Supplementary material for: High Expression of Derlin-1 Is Associated with the Malignancy of Bladder Cancer in a Chinese Han Population
Source: PLoS One. 2016 Dec 15;11(12):e0168351. doi: 10.1371/journal.pone.0168351 (PMC5158059; doi:10.1371/journal.pone.0168351)
Supplement: S1 Table — A total of 165 proteins were 1.5-fold differentially expressed (P < 0.05), of which 146 proteins were down-regulated, and 19 proteins were up-regulated (FDR < 0.05). (XLS) [file pone.0168351.s001.xls]

## Sheet: Supplemental Table S1
No	Accession	Description	Normal 1	Normal 2	Normal 3	Tumor 1	Tumor 2	Tumor 3	N AVE	T AVE	T1/N1	T2/N2	T3/N3	T/N	P Value
1	4885375	histone H1.2	0.887668	0.397738	0.194737	1.64046	1.44669	1.38225	0.493381	1.4898	1.84805	3.63728	7.09802	3.01957	0.010554
2	530409356	PREDICTED: hematological and neurological expressed 1-like isoform X2	0.419942	0.696225	0.661378	1.33757	1.25618	1.34439	0.592515	1.31271	3.18513	1.80427	2.0327	2.21549	0.00140098
3	530390429	PREDICTED: acidic leucine-rich nuclear phosphoprotein 32 family member B isoform X2	0.851443	0.684914	0.535512	1.52666	1.31606	1.22685	0.690623	1.35652	1.79303	1.92149	2.29098	1.9642	0.00639403
4	4885381	histone H1.5	0.879917	0.616202	0.452176	1.38619	1.04589	1.37572	0.649432	1.26927	1.57537	1.69732	3.04245	1.95443	0.0207656
5	224028248	non-POU domain-containing octamer-binding protein isoform 2	0.836048	0.536136	0.716509	1.51916	1.44637	1.10329	0.696231	1.35627	1.81707	2.69777	1.53982	1.94802	0.0130843
6	253970456	HIV Tat-specific factor 1	0.76336	0.656752	0.636296	1.56767	1.36013	1.06192	0.685469	1.32991	2.05365	2.071	1.66891	1.94014	0.0132581
7	410169930	PREDICTED: splicing factor, arginine/serine-rich 19-like	0.961774	0.573622	0.56369	1.40053	1.32714	1.21827	0.699696	1.31531	1.4562	2.31362	2.16123	1.87984	0.0121101
8	89276756	serine/threonine-protein kinase PRP4 homolog	0.735827	0.515894	0.716269	1.21871	0.954175	1.4147	0.655997	1.19586	1.65624	1.84956	1.9751	1.82297	0.0231718
9	530402309	PREDICTED: dolichyl-phosphate beta-glucosyltransferase isoform X1	0.741253	0.784517	0.602596	1.33618	1.16468	1.30687	0.709455	1.26924	1.8026	1.48458	2.16874	1.78904	0.00183393
10	284795266	signal recognition particle receptor subunit beta	0.69118	0.739978	0.707222	1.28903	1.11912	1.17996	0.712794	1.19604	1.86497	1.51237	1.66845	1.67796	0.000731506
11	530389327	PREDICTED: derlin-1 isoform X1	0.765889	0.77377	0.814903	1.3016	1.56712	1.08206	0.784854	1.31693	1.69947	2.0253	1.32784	1.67793	0.0195681
12	215820635	relA-associated inhibitor	0.652923	0.681193	0.913734	1.20283	1.21191	1.28189	0.749283	1.23221	1.84223	1.7791	1.40291	1.64452	0.00500989
13	42741682	zinc finger Ran-binding domain-containing protein 2 isoform 2	0.867354	0.603715	0.85925	1.42821	1.24433	1.05936	0.776773	1.24397	1.64662	2.06112	1.23289	1.60145	0.027161
14	530368915	PREDICTED: eukaryotic translation initiation factor 5B isoform X1	0.858513	0.899766	0.627429	1.24272	1.28899	1.20245	0.795236	1.24472	1.44753	1.43258	1.91648	1.56522	0.00704493
15	530397094	PREDICTED: zinc finger protein ubi-d4 isoform X2	0.799675	0.855113	0.814248	1.3688	1.39427	1.03824	0.823012	1.2671	1.71169	1.63051	1.27509	1.53959	0.0185721
16	530407915	PREDICTED: ribosomal L1 domain-containing protein 1 isoform X1	0.88236	0.922298	0.679156	1.36506	1.4398	1.01902	0.827938	1.27462	1.54705	1.5611	1.50042	1.53952	0.0407336
17	102469694	galectin-9 isoform short	0.964446	0.788606	0.693193	1.31625	1.32819	1.10233	0.815415	1.24892	1.36477	1.68423	1.59022	1.53164	0.0160158
18	44889481	unconventional myosin-Ib isoform 2	0.747127	0.661291	0.690385	1.00954	0.877018	1.29662	0.699601	1.06106	1.35123	1.32622	1.87812	1.51666	0.0459221
19	9910382	mitochondrial import receptor subunit TOM22 homolog	0.843582	0.629806	0.941896	1.22884	1.22458	1.1853	0.805095	1.2129	1.45669	1.94437	1.25842	1.50654	0.0118986
20	4507877	vinculin isoform VCL	1.2002	1.14753	1.34114	0.765935	0.812218	0.871753	1.22962	0.816635	0.638173	0.707796	0.65001	0.664135	0.00321774
21	192448443	peptidyl-prolyl cis-trans isomerase FKBP10 precursor	1.21091	1.4565	1.09943	0.788656	0.791385	0.921169	1.25561	0.833737	0.651291	0.543349	0.837859	0.664007	0.0209264
22	308818200	dihydropyrimidinase-related protein 3 isoform 1	1.18667	0.989128	1.30698	0.82722	0.59643	0.888173	1.16093	0.770608	0.697093	0.602986	0.679561	0.663787	0.038381
23	530360613	PREDICTED: dnaJ homolog subfamily C member 11 isoform X1	1.2334	1.02352	1.49115	0.81201	0.826193	0.846408	1.24935	0.828204	0.658352	0.807209	0.567623	0.662905	0.0360138
24	530421461	PREDICTED: amine oxidase [flavin-containing] B isoform X4	1.07295	1.45073	1.39637	0.89121	0.839523	0.866225	1.30668	0.865652	0.830614	0.578691	0.620342	0.662481	0.0206415
25	507144081	NEDD8-conjugating enzyme UBE2F isoform 3	1.3213	1.40852	1.11459	0.96027	0.797656	0.777761	1.28147	0.845229	0.726761	0.566307	0.697798	0.659576	0.0140169
26	148277046	angiogenin precursor	1.31252	1.43355	1.10351	0.936958	0.804228	0.790812	1.28319	0.843999	0.713864	0.561005	0.716636	0.657735	0.0148378
27	34734066	fibulin-1 isoform D precursor	1.12511	1.2663	1.35518	0.752825	0.96631	0.740071	1.24886	0.819735	0.669115	0.763098	0.546106	0.656386	0.0124568
28	530361867	PREDICTED: di-N-acetylchitobiase isoform X2	1.44673	1.26234	1.16784	0.817499	0.922277	0.795059	1.29231	0.844945	0.565066	0.730606	0.680794	0.653827	0.00788772
29	19923973	BTB/POZ domain-containing protein KCTD12	1.38589	1.38404	1.00988	0.821495	0.738687	0.903644	1.25994	0.821275	0.592756	0.533717	0.894801	0.651837	0.0305369
30	533112473	set1/Ash2 histone methyltransferase complex subunit ASH2 isoform d	1.22258	1.05607	1.47137	0.688611	0.905932	0.84766	1.25001	0.814068	0.563244	0.85783	0.576103	0.65125	0.0334951
31	91807125	protein FAM3C precursor	1.12653	1.39082	1.14746	0.67307	0.66436	1.04444	1.2216	0.793957	0.59747	0.477675	0.910222	0.64993	0.0475002
32	31542673	charged multivesicular body protein 6	1.54648	1.24793	1.11808	0.786154	0.966611	0.785252	1.30416	0.846006	0.508352	0.774573	0.702322	0.648697	0.0310071
33	301601630	LIM and senescent cell antigen-like-containing domain protein 1 isoform b	1.26929	1.31609	1.27472	0.742017	0.955004	0.774175	1.2867	0.823732	0.58459	0.725639	0.607328	0.640189	0.00242082
34	5901944	EMILIN-1 precursor	1.29286	1.05477	1.35997	0.722018	0.824183	0.825982	1.23587	0.790728	0.558466	0.781389	0.607352	0.639817	0.0107657
35	302191611	cysteine and glycine-rich protein 1 isoform 3	1.28014	1.55549	1.096	0.874668	0.838714	0.786084	1.31054	0.833156	0.68326	0.539197	0.717228	0.635733	0.0246474
36	306966132	spectrin alpha chain, non-erythrocytic 1 isoform 3	1.19851	1.28299	1.40178	0.766921	0.933165	0.758152	1.29443	0.819413	0.639893	0.727338	0.540851	0.633032	0.00440609
37	42544239	complement factor D preproprotein	1.3728	1.29875	1.23092	0.742102	0.880123	0.8393	1.30082	0.820508	0.540575	0.677671	0.681847	0.630761	0.00115421
38	73858566	heparin cofactor 2 precursor	1.35301	1.34911	1.06087	0.775647	0.900365	0.694205	1.25433	0.790072	0.573276	0.667376	0.654374	0.629876	0.0151064
39	384081574	PDZ and LIM domain protein 3 isoform d	1.38027	1.32524	1.16482	0.560537	0.983496	0.878797	1.29011	0.80761	0.406106	0.742124	0.75445	0.626	0.0277291
40	264681524	lipoma-preferred partner isoform a	1.40135	1.09843	1.30096	0.878447	0.615063	0.868924	1.26691	0.787478	0.62686	0.559948	0.66791	0.621573	0.0180483
41	147904340	WD repeat-containing protein 82	1.09048	1.3767	1.312	0.917387	0.529398	0.896811	1.25972	0.781199	0.841273	0.384542	0.683545	0.620135	0.0352373
42	45580688	complement component C7 precursor	1.3053	1.25884	1.31824	0.709358	0.766908	0.92767	1.29412	0.801312	0.543445	0.60922	0.70372	0.619192	0.00189984
43	33188445	microtubule-actin cross-linking factor 1	1.50516	1.49417	1.0821	0.749303	1.04643	0.724972	1.36048	0.840235	0.497822	0.700344	0.669967	0.617603	0.0399217
44	4507467	transforming growth factor-beta-induced protein ig-h3 precursor	1.22939	1.1006	1.36286	0.734909	0.615002	0.914257	1.23095	0.754723	0.597783	0.558786	0.670839	0.613122	0.0144877
45	7524354	N(G),N(G)-dimethylarginine dimethylaminohydrolase 2	1.13443	1.18639	1.50137	0.72715	0.741921	0.863427	1.27406	0.7775	0.640981	0.625362	0.575092	0.610252	0.01543
46	29568111	myosin regulatory light polypeptide 9 isoform a	1.335	1.20512	1.26373	0.891315	0.60213	0.82685	1.26795	0.773432	0.667654	0.499643	0.654294	0.609987	0.00657876
47	530389709	PREDICTED: Golgi-associated plant pathogenesis-related protein 1 isoform X2	1.65008	1.11306	1.25298	0.746222	0.816289	0.868826	1.3387	0.810445	0.452235	0.733376	0.693406	0.605395	0.0326781
48	18379349	synaptic vesicle membrane protein VAT-1 homolog	1.16999	1.19653	1.43215	0.740188	0.634364	0.915653	1.26622	0.763402	0.632644	0.53017	0.639355	0.602896	0.0126393
49	530396062	PREDICTED: CD81 antigen isoform X1	1.12823	1.08058	1.5409	0.612808	0.729294	0.915295	1.2499	0.752466	0.543158	0.674912	0.594	0.602019	0.0434552
50	63253298	spermidine synthase	1.2983	1.51877	1.1854	0.776373	0.869391	0.759868	1.33416	0.801877	0.597994	0.572431	0.641021	0.601037	0.00681491
51	530370900	PREDICTED: tensin-1 isoform X4	1.18161	1.42807	1.32914	0.726846	0.866363	0.758171	1.31294	0.783793	0.615133	0.606668	0.570421	0.596976	0.00312587
52	21389433	heat shock protein beta-6	1.46581	0.897555	1.39092	0.770363	0.737183	0.7333	1.25143	0.746948	0.525554	0.821323	0.527205	0.596877	0.0476342
53	4503049	cysteine-rich protein 2 isoform 1	1.46322	1.31961	1.10253	0.718142	0.578915	1.00299	1.29512	0.766682	0.490796	0.438701	0.909713	0.591977	0.0316111
54	124494238	unconventional myosin-Ic isoform a	1.19653	1.12973	1.47838	0.761421	0.61635	0.863955	1.26821	0.747242	0.636358	0.545571	0.584394	0.589208	0.015517
55	86788015	EGF-containing fibulin-like extracellular matrix protein 1 precursor	1.41524	1.2544	1.25489	0.717965	0.752633	0.83564	1.30818	0.768746	0.50731	0.599995	0.665906	0.587647	0.00107919
56	211971074	A-kinase anchor protein 2 isoform 2	1.40421	1.36961	1.26747	0.630324	0.893828	0.836593	1.3471	0.786915	0.448882	0.652614	0.660048	0.584156	0.00338334
57	34485714	ras-related protein Rab-23	1.18486	1.24942	1.47994	0.765373	0.688392	0.813404	1.30474	0.755723	0.64596	0.550967	0.549618	0.579212	0.00474552
58	208609962	ras-related protein Rab-7L1 isoform 1	1.12575	1.39245	1.26559	0.703145	0.74892	0.729944	1.26126	0.727336	0.6246	0.537843	0.576763	0.576673	0.00240126
59	530413850	PREDICTED: protein IMPACT isoform X1	1.245	1.21217	1.45059	0.834171	0.576488	0.841851	1.30259	0.750836	0.670019	0.475583	0.580349	0.576419	0.00859953
60	160420317	filamin-A isoform 2	1.47558	1.2877	1.19588	0.710439	0.76345	0.807398	1.31972	0.760429	0.481464	0.592881	0.675149	0.576205	0.00300518
61	15451856	caveolin-1 isoform alpha	1.2237	1.26705	1.45358	0.7099	0.789207	0.771241	1.31477	0.756783	0.580126	0.622872	0.530581	0.575599	0.00169915
62	224591430	cell growth-regulating nucleolar protein	1.5983	1.33747	1.06425	0.778832	0.828645	0.694028	1.33334	0.767168	0.487286	0.619562	0.652126	0.575372	0.02362
63	247301334	centrosomal protein kizuna isoform 3	1.31013	1.39111	1.13703	0.79005	0.410761	0.990833	1.27942	0.730548	0.603033	0.295277	0.871421	0.570999	0.0418319
64	257900476	transforming growth factor beta-1-induced transcript 1 protein isoform 2	1.56172	1.08528	1.20169	0.736258	0.60241	0.8502	1.2829	0.729623	0.47144	0.555075	0.707503	0.568731	0.0260138
65	213688375	actin, aortic smooth muscle	1.43673	1.47985	1.18351	0.74547	0.852193	0.73404	1.36669	0.777234	0.518867	0.575866	0.620225	0.568697	0.00411245
66	530368012	PREDICTED: spectrin beta chain, non-erythrocytic 1 isoform X1	1.16499	1.23695	1.58417	0.715223	0.771991	0.767702	1.32871	0.751639	0.613931	0.624108	0.484607	0.565693	0.0115517
67	5730075	fibroleukin precursor	1.60132	1.45827	0.989436	0.812023	0.721621	0.750881	1.34968	0.761509	0.507096	0.494846	0.758898	0.564216	0.0345042
68	288541299	protein NOXP20	1.24142	1.10805	1.40794	0.710524	0.461527	0.945692	1.25247	0.705914	0.572347	0.416521	0.671684	0.563617	0.0293169
69	4502261	antithrombin-III precursor	1.63656	1.24118	1.21167	0.650306	0.930767	0.709377	1.36314	0.763483	0.397361	0.749904	0.585454	0.560092	0.0205577
70	294660765	abhydrolase domain-containing protein 16A isoform b	1.14159	1.59031	1.30004	0.850677	0.577916	0.815188	1.34398	0.747927	0.745169	0.363398	0.627048	0.556501	0.0190897
71	207028935	microfibrillar-associated protein 2 isoform b precursor	1.52697	1.34886	1.27581	0.794284	0.815273	0.698135	1.38388	0.769231	0.520169	0.604415	0.547211	0.55585	0.00176169
72	4502119	membrane primary amine oxidase isoform 1	1.44583	1.14398	1.36051	0.680006	0.797091	0.715949	1.31677	0.731015	0.470323	0.696768	0.526235	0.555156	0.00368974
73	530381599	PREDICTED: peptidase inhibitor 16 isoform X3	1.497	1.13471	1.4369	0.630707	0.93543	0.688452	1.35621	0.75153	0.421312	0.824377	0.479123	0.554141	0.014338
74	61175222	placenta-specific protein 9 precursor	1.57243	1.04072	1.5203	0.590495	0.89976	0.761197	1.37782	0.750484	0.375531	0.864558	0.500687	0.544691	0.0305705
75	530421227	PREDICTED: ribosomal protein S6 kinase alpha-3 isoform X5	1.12383	1.55068	1.34285	0.886886	0.469579	0.82411	1.33912	0.726859	0.789162	0.302822	0.613702	0.542788	0.0267978
76	209969812	KN motif and ankyrin repeat domain-containing protein 2 isoform 2	1.16246	1.12549	1.74547	0.751168	0.617666	0.817064	1.34447	0.728633	0.646187	0.548798	0.468106	0.541947	0.0422136
77	304376294	conserved oligomeric Golgi complex subunit 4 isoform 2	1.48726	1.56649	1.12897	0.680282	0.785565	0.79216	1.39424	0.752669	0.457405	0.501482	0.701666	0.539842	0.0100097
78	188528648	tenascin-X isoform 1 precursor	1.30209	1.49265	1.33976	0.679971	0.795043	0.736149	1.37817	0.737055	0.522216	0.53264	0.549464	0.534808	0.000669117
79	6006001	glutathione peroxidase 3 precursor	1.55156	1.34243	1.20393	0.586954	0.822216	0.770788	1.36597	0.726653	0.378299	0.612484	0.640229	0.531967	0.00666528
80	11496885	PDZ and LIM domain protein 7 isoform 1	1.39514	1.39379	1.25472	0.745041	0.61779	0.786436	1.34789	0.716423	0.534026	0.443244	0.62678	0.531516	0.000786142
81	4826772	insulin-like growth factor-binding protein complex acid labile subunit isoform 2 precursor	1.47383	1.57845	1.07912	0.475734	0.873642	0.843505	1.37713	0.73096	0.322788	0.553481	0.78166	0.530784	0.0313094
82	19549331	cytoglobin	1.17619	1.10953	1.74111	0.725732	0.631929	0.753456	1.34228	0.703706	0.617018	0.569549	0.432744	0.524263	0.0350158
83	530374701	PREDICTED: myosin light chain kinase, smooth muscle isoform X4	1.42109	1.3139	1.34188	0.728811	0.625463	0.745231	1.35896	0.699835	0.512855	0.476035	0.555362	0.51498	0.000181727
84	53692189	adipocyte enhancer-binding protein 1 precursor	1.43437	1.36734	1.40557	0.68864	0.851342	0.619739	1.40243	0.719907	0.480098	0.622626	0.440917	0.513329	0.000667347
85	21536286	creatine kinase B-type	1.26799	1.15919	1.70539	0.672079	0.698957	0.7443	1.37752	0.705112	0.530034	0.602972	0.436439	0.511869	0.0161743
86	4506761	protein S100-A10	1.25156	1.61928	1.52041	0.518387	1.10676	0.60996	1.46375	0.745037	0.414193	0.683492	0.401181	0.508992	0.0280416
87	153945790	myosin-8	1.59659	1.44961	1.21387	0.740107	0.695185	0.723163	1.42002	0.719485	0.463556	0.479567	0.595752	0.506672	0.0033578
88	28076869	serpin B4	1.33481	1.77669	1.24144	1.03778	0.606712	0.548389	1.45098	0.730961	0.777474	0.341484	0.441737	0.50377	0.0333366
89	110624774	C-type mannose receptor 2 precursor	1.22103	1.22077	1.62954	0.57953	0.763016	0.699417	1.35711	0.680655	0.474625	0.625031	0.429212	0.501547	0.00988865
90	47132589	serine/threonine-protein kinase N1 isoform 2	1.87673	1.24668	1.10978	0.801957	0.603352	0.711522	1.41106	0.70561	0.427315	0.483968	0.641138	0.500056	0.0440032
91	268607694	four and a half LIM domains protein 1 isoform 2	1.23279	1.33569	1.57516	0.697521	0.738654	0.621379	1.38121	0.685852	0.565809	0.553012	0.394487	0.496558	0.00290026
92	4501987	afamin precursor	1.37427	1.71477	1.21068	0.55981	0.828013	0.714268	1.43324	0.700697	0.407351	0.482872	0.589971	0.48889	0.0119572
93	39725934	pigment epithelium-derived factor precursor	1.46883	1.3786	1.44504	0.617577	0.771513	0.699758	1.43082	0.696283	0.420456	0.559634	0.484248	0.486631	0.000146064
94	10880134	beta-arrestin-1 isoform B	1.28829	1.50615	1.29087	0.593055	0.516539	0.867385	1.36177	0.658993	0.460345	0.342953	0.671939	0.483924	0.00546417
95	78000160	sorbin and SH3 domain-containing protein 1 isoform 1	1.48435	1.55315	1.23287	0.633102	0.649684	0.777114	1.42346	0.686633	0.426517	0.4183	0.630328	0.482369	0.0023675
96	530390727	PREDICTED: retinal dehydrogenase 1 isoform X2	1.05437	1.29271	1.94023	0.715736	0.718814	0.617099	1.4291	0.683883	0.678829	0.556051	0.318054	0.47854	0.0491329
97	224586855	sorbin and SH3 domain-containing protein 2 isoform 8	1.33926	1.89498	1.20201	0.687982	0.813577	0.608103	1.47875	0.703221	0.513702	0.429333	0.505904	0.47555	0.0243828
98	51873055	fibulin-2 isoform b precursor	1.49191	1.33614	1.50875	0.503283	0.7675	0.785148	1.4456	0.68531	0.337341	0.574414	0.520395	0.474065	0.00203164
99	295986608	immunoglobulin lambda-like polypeptide 5 isoform 1	1.55851	1.80253	0.965991	0.775562	0.561338	0.706254	1.44234	0.681052	0.497631	0.311417	0.731119	0.472184	0.0411164
100	429836867	transcription factor EB isoform 3	1.65032	1.76979	1.25635	0.611495	1.10326	0.482036	1.55882	0.732265	0.370531	0.623387	0.383679	0.469755	0.0278338
101	68508957	liver carboxylesterase 1 isoform c precursor	1.23159	1.42786	1.68164	0.638257	0.658218	0.735917	1.44703	0.677464	0.518237	0.460982	0.437619	0.468175	0.00451018
102	344313186	gamma-secretase subunit APH-1A isoform 4	1.24652	1.81918	1.31568	0.66926	0.627369	0.753126	1.46046	0.683252	0.536901	0.344863	0.572426	0.467833	0.0134884
103	194097350	alpha-actinin-1 isoform a	1.55079	1.24115	1.41612	0.7334	0.466233	0.748284	1.40269	0.649306	0.472922	0.375645	0.528406	0.462902	0.00418763
104	4557287	angiotensinogen preproprotein	1.68569	1.47328	1.15149	0.67943	0.664053	0.645041	1.43682	0.662841	0.403057	0.450732	0.560179	0.461325	0.00762951
105	133922562	phosphoglucomutase-like protein 5	1.17141	1.26419	1.75776	0.617457	0.715452	0.597655	1.39779	0.643521	0.527107	0.565935	0.34001	0.460386	0.0152927
106	4507725	transthyretin precursor	1.6489	1.69723	1.29247	0.584483	0.863379	0.687314	1.5462	0.711725	0.354469	0.508699	0.531783	0.460306	0.0052865
107	324021743	vitamin D-binding protein isoform 1 precursor	2.00495	1.4197	1.11611	0.632246	0.827316	0.602912	1.51359	0.687491	0.315343	0.58274	0.54019	0.454214	0.0377491
108	156523970	alpha-2-HS-glycoprotein preproprotein	1.34858	1.50595	1.49198	0.577186	0.707533	0.686546	1.44884	0.657088	0.427995	0.469826	0.460158	0.453529	0.000253158
109	4502067	protein AMBP preproprotein	1.74554	1.31047	1.2505	0.566651	0.610507	0.768532	1.4355	0.648563	0.324627	0.46587	0.614581	0.451802	0.00934044
110	205277441	thyroxine-binding globulin precursor	1.88339	1.5624	1.12382	0.572293	0.843901	0.647974	1.5232	0.688056	0.303864	0.540131	0.576584	0.451717	0.023572
111	193083185	synaptopodin-2 isoform b	1.68961	1.2445	1.13603	0.681616	0.318335	0.824742	1.35671	0.608231	0.403416	0.255794	0.725986	0.448313	0.0298963
112	62414289	vimentin	1.4887	1.46496	1.30045	0.664045	0.435956	0.806055	1.41804	0.635352	0.446057	0.297588	0.61983	0.448051	0.00312496
113	4503579	band 4.1-like protein 2 isoform a	1.25925	1.51333	1.65844	0.653052	0.722955	0.605693	1.477	0.660567	0.518605	0.477725	0.365219	0.447234	0.00255625
114	209862839	IgG receptor FcRn large subunit p51 precursor	1.29841	1.87625	1.0806	0.590525	0.404927	0.907455	1.41842	0.634302	0.454807	0.215817	0.839766	0.447189	0.0483274
115	51873067	sulfhydryl oxidase 1 isoform b precursor	1.36483	1.86143	1.20398	0.680168	0.583519	0.693321	1.47675	0.652336	0.498355	0.313479	0.575856	0.441739	0.0148028
116	530367920	PREDICTED: proto-oncogene c-Rel isoform X3	1.79621	1.43787	1.26688	0.711908	0.650554	0.623117	1.50032	0.661859	0.396338	0.452442	0.491852	0.441145	0.00608119
117	115527062	collagen alpha-2(VI) chain isoform 2C2 precursor	1.22715	1.70603	1.40205	0.632132	0.530713	0.727219	1.44507	0.630021	0.515124	0.311082	0.518683	0.435979	0.00569702
118	47132587	protein kinase C delta-binding protein	1.49089	1.54452	1.54866	0.607377	0.761696	0.627116	1.52803	0.665396	0.407392	0.493159	0.40494	0.435461	7.69509e-05
119	530416377	PREDICTED: EH domain-containing protein 2 isoform X1	1.36165	1.34389	1.68215	0.574443	0.658818	0.672021	1.46256	0.635094	0.421873	0.490232	0.399502	0.434234	0.00191827
120	530366087	PREDICTED: complement decay-accelerating factor isoform X1	1.53305	1.09843	1.61203	0.694612	0.490916	0.646246	1.4145	0.610591	0.453091	0.446927	0.40089	0.431665	0.00931671
121	4502337	zinc-alpha-2-glycoprotein precursor	1.29889	1.66369	1.49722	0.513701	0.734619	0.659828	1.4866	0.636049	0.395493	0.441561	0.440702	0.427856	0.00235102
122	13124879	myosin-11 isoform SM1A	1.41909	1.48716	1.53685	0.607855	0.631451	0.660926	1.48103	0.633411	0.428342	0.424601	0.430053	0.427682	2.25114e-05
123	19743846	decorin isoform a preproprotein	1.2886	1.52998	1.62158	0.576762	0.664351	0.651788	1.48005	0.630967	0.447589	0.434223	0.401947	0.426314	0.0011813
124	118582275	extracellular superoxide dismutase [Cu-Zn] precursor	1.10288	1.36496	2.00979	0.672035	0.619992	0.588366	1.49254	0.626798	0.609343	0.45422	0.29275	0.419953	0.032907
125	48255907	transgelin	1.69361	1.61354	1.16191	0.580785	0.608739	0.679604	1.48969	0.623043	0.342928	0.37727	0.5849	0.418238	0.00671887
126	55743122	retinol-binding protein 4 precursor	1.91786	1.63791	1.08007	0.640044	0.718098	0.56931	1.54528	0.642484	0.333728	0.438424	0.527106	0.415772	0.0225231
127	47519616	tropomyosin beta chain isoform 2	1.60634	1.56988	1.25033	0.70103	0.361885	0.769937	1.47551	0.610951	0.436414	0.230518	0.615789	0.414059	0.00696303
128	21361120	calponin-1	1.37464	1.92848	1.17645	0.656258	0.478253	0.700538	1.49319	0.611683	0.477404	0.247994	0.595467	0.409648	0.0199472
129	13699859	prostacyclin synthase precursor	1.94562	1.67929	1.1329	0.519625	0.986249	0.442151	1.58594	0.649342	0.267074	0.587302	0.390282	0.409437	0.0331546
130	87196339	collagen alpha-1(VI) chain precursor	1.21038	1.81849	1.51291	0.572889	0.590465	0.687612	1.51393	0.616989	0.473312	0.324702	0.454496	0.407542	0.00745286
131	4504893	kininogen-1 isoform 2 precursor	2.02061	1.40563	1.14153	0.559068	0.670713	0.628853	1.52259	0.619545	0.276683	0.477163	0.550887	0.406903	0.0262732
132	9910270	olfactomedin-like protein 3 isoform 1 precursor	1.01812	1.52907	2.13249	0.522638	0.794006	0.565897	1.55989	0.627514	0.513338	0.519274	0.265369	0.40228	0.0487646
133	301069322	asporin isoform 1 preproprotein	1.43198	1.64323	1.31984	0.577571	0.458277	0.691355	1.46502	0.575735	0.403337	0.278889	0.523816	0.392988	0.00156935
134	11321561	hemopexin precursor	1.97748	1.19849	1.31654	0.606876	0.585086	0.565835	1.4975	0.585932	0.306893	0.488184	0.42979	0.391272	0.0198402
135	530412098	PREDICTED: beta-2-glycoprotein 1 isoform X1	2.05233	1.29566	1.20077	0.567306	0.604001	0.591889	1.51625	0.587732	0.27642	0.466172	0.492926	0.387621	0.0262119
136	530369158	PREDICTED: myc box-dependent-interacting protein 1 isoform X7	1.51381	1.302	1.63804	0.584891	0.389314	0.751293	1.48462	0.575166	0.386371	0.299012	0.458653	0.387417	0.00316641
137	48762937	annexin A10	2.10214	1.0826	1.38296	0.687244	0.460997	0.613136	1.52257	0.587126	0.326925	0.425824	0.443352	0.385616	0.0391546
138	4557321	apolipoprotein A-I preproprotein	1.98585	1.69489	1.24546	0.515178	0.883628	0.461385	1.64207	0.620064	0.259424	0.52135	0.370453	0.377612	0.0156009
139	4503057	alpha-crystallin B chain	1.58381	1.26574	1.61243	0.549853	0.559079	0.569246	1.48732	0.559393	0.347172	0.441702	0.353036	0.376106	0.0011289
140	4504981	galectin-1	1.33609	1.11047	1.95259	0.577109	0.294181	0.77683	1.46638	0.549374	0.431939	0.264916	0.397846	0.374645	0.0334067
141	4502403	biglycan preproprotein	0.997739	1.99388	1.64349	0.491942	0.536374	0.68098	1.54504	0.569765	0.493057	0.269009	0.414349	0.368771	0.0304802
142	41349454	prolargin precursor	1.15265	1.812	1.83987	0.523815	0.71237	0.524785	1.60151	0.58699	0.454446	0.393139	0.28523	0.366524	0.0121461
143	4502149	apolipoprotein A-II preproprotein	1.79788	1.77562	1.31537	0.470052	0.816215	0.491998	1.62962	0.592755	0.261448	0.459679	0.374038	0.363737	0.00579942
144	4557871	serotransferrin precursor	1.72014	1.66995	1.336	0.530574	0.586192	0.5925	1.57536	0.569755	0.308448	0.351025	0.443488	0.361666	0.00118701
145	112380630	leiomodin-1	1.61994	1.66242	1.3465	0.43546	0.526004	0.706159	1.54295	0.555875	0.268812	0.316409	0.524441	0.360267	0.00147727
146	42734430	polymerase I and transcript release factor	1.43185	1.25929	1.78068	0.58433	0.415802	0.602304	1.49061	0.534145	0.408095	0.330187	0.338243	0.358341	0.00435089
147	55749932	desmin	1.69354	1.8593	1.23136	0.546969	0.589485	0.577304	1.59473	0.571253	0.322974	0.317047	0.468836	0.358213	0.00556087
148	530371359	PREDICTED: collagen alpha-3(VI) chain isoform X1	1.41365	2.14052	1.43251	0.498326	0.721187	0.523383	1.66223	0.580965	0.352509	0.33692	0.365362	0.34951	0.012293
149	21361091	ubiquitin carboxyl-terminal hydrolase isozyme L1	1.21996	1.53861	2.07517	0.376904	0.735473	0.556712	1.61124	0.556363	0.308948	0.478012	0.268273	0.3453	0.0174708
150	530362950	PREDICTED: cAMP-dependent protein kinase catalytic subunit beta isoform X5	1.54717	1.61434	1.52905	0.579983	0.31856	0.698995	1.56352	0.532513	0.374867	0.197331	0.457142	0.340585	0.000865463
151	44680105	caldesmon isoform 1	2.08609	1.51833	1.34846	0.398695	0.68204	0.574275	1.65096	0.55167	0.191121	0.449205	0.425876	0.334152	0.00986337
152	4502133	serum amyloid P-component precursor	1.47177	1.78689	1.75417	0.395899	0.774203	0.498865	1.67094	0.556322	0.268995	0.433269	0.284388	0.332939	0.00178915
153	23111005	microfibril-associated glycoprotein 4 isoform 2 precursor	1.62143	1.57688	1.75551	0.516032	0.616192	0.460789	1.65128	0.531004	0.318257	0.390765	0.262482	0.321572	9.09375e-05
154	111118976	collagen alpha-1(II) chain isoform 1 precursor	1.38946	2.11839	1.28554	0.760933	0.182972	0.5173	1.5978	0.487068	0.547645	0.0863732	0.402399	0.304837	0.0233443
155	48762934	collagen alpha-2(I) chain precursor	1.38352	2.34336	1.36431	0.400559	0.589877	0.540927	1.69706	0.510454	0.289522	0.251723	0.396484	0.300787	0.0224329
156	32307172	dermatopontin precursor	1.43676	1.92941	1.68738	0.511083	0.388495	0.576129	1.68452	0.491902	0.355719	0.201354	0.341434	0.292014	0.00144281
157	530393567	PREDICTED: insulin-degrading enzyme isoform X5	1.68484	2.46361	1.09343	0.461703	0.550838	0.476135	1.7473	0.496225	0.274034	0.223589	0.435449	0.283996	0.0346623
158	55743096	collagen alpha-1(XIV) chain precursor	1.54721	1.71698	1.79878	0.407763	0.528776	0.454744	1.68766	0.463761	0.263548	0.307968	0.252807	0.274796	0.000117567
159	194595509	spectrin alpha chain, non-erythrocytic 1 isoform 1	1.13214	1.37898	2.49926	0.34143	0.459512	0.550319	1.67013	0.45042	0.301579	0.333227	0.220193	0.269693	0.0454643
160	45269149	nicotinate-nucleotide pyrophosphorylase [carboxylating] precursor	2.57663	1.44562	1.27744	0.360766	0.591214	0.4111	1.76656	0.45436	0.140015	0.40897	0.321816	0.2572	0.0338435
161	110349772	collagen alpha-1(I) chain preproprotein	1.41875	2.72778	1.25927	0.403048	0.482293	0.494322	1.80193	0.459888	0.284087	0.176808	0.392545	0.255219	0.0450406
162	4502027	serum albumin preproprotein	1.87302	1.87148	1.45458	0.354311	0.448652	0.452501	1.73303	0.418488	0.189166	0.239731	0.311087	0.241478	0.00077529
163	34577061	alcohol dehydrogenase 1B	1.44295	1.63509	2.04945	0.356569	0.411758	0.430715	1.70917	0.39968	0.247111	0.251825	0.210161	0.233845	0.00191007
164	4505047	lumican precursor	1.38695	2.00864	2.07147	0.30851	0.367251	0.425872	1.82235	0.367211	0.222439	0.182836	0.205589	0.201504	0.00275808
165	7661704	mimecan preproprotein	1.43209	1.81563	2.42038	0.252455	0.363595	0.308348	1.88937	0.308132	0.176284	0.200258	0.127397	0.163088	0.00545973
